# Supplementary material for: Low voltage operation of a silver/silver chloride battery with high desalination capacity in seawater
Source: PubMed Central journal article supplement (PMC9064245; doi:10.1039/c9ra02570g), 2019-05-14
Supplement: RA-009-C9RA02570G-s001.pdf [file RA-009-C9RA02570G-s001.pdf]

## *Supplementary Information*

### **Low voltage operation of a silver/silver chloride battery with high desalination capacity in seawater**

**Pattarachai Srimuk,<sup>1,2</sup> Samantha Husmann,<sup>1</sup> Volker Presser<sup>1,2,\*</sup>**

<sup>1</sup> INM - Leibniz Institute for New Materials, 66123 Saarbrücken, Germany

<sup>2</sup> Department of Materials Science and Engineering, Saarland University, 66123 Saarbrücken, Germany

\* Corresponding author's eMail: [volker.presser@leibniz-inm.de](mailto:volker.presser@leibniz-inm.de)

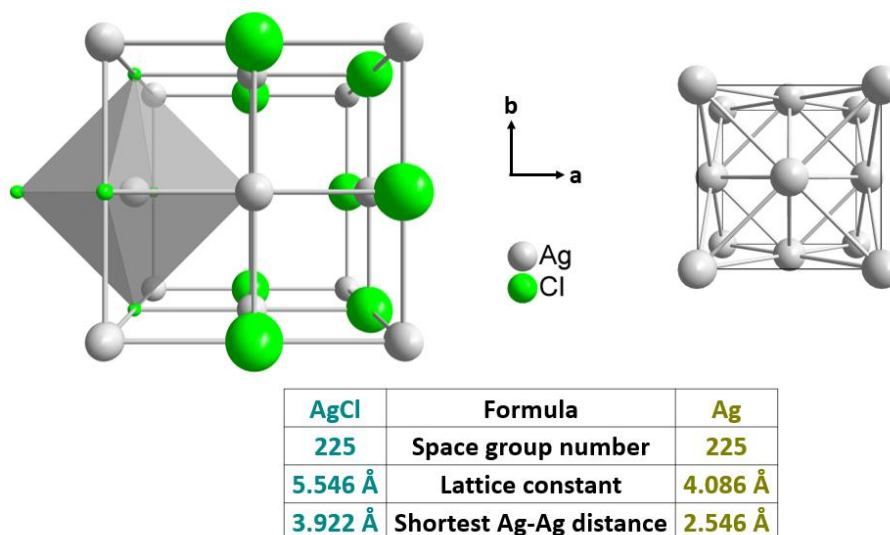

**Figure S1:** Ideal crystal structure of AgCl and Ag along with selected crystallographic information.

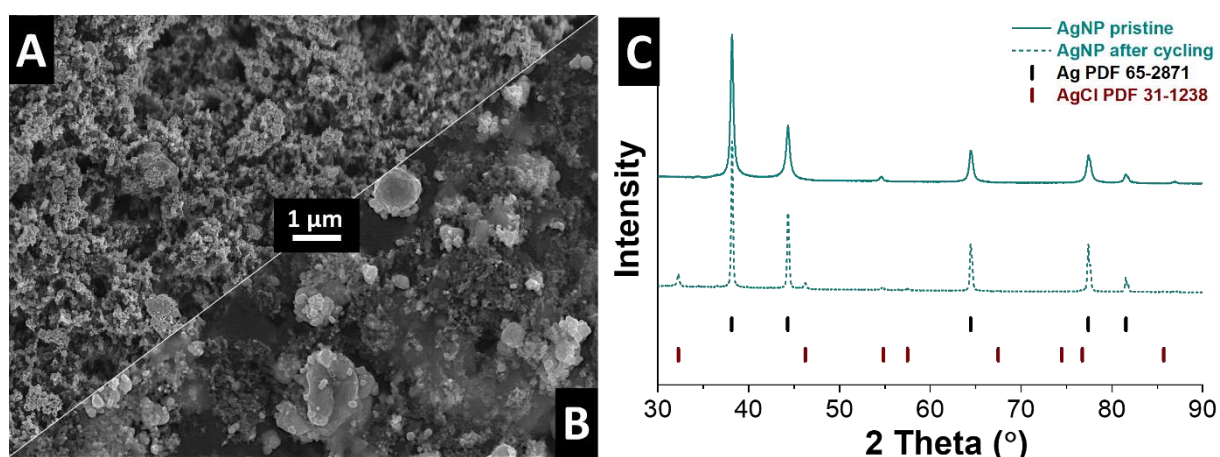

**Figure S2:** A) scanning electron micrograph of AgNP-10CB electrode before (up) and after electrochemistry (bottom) and B) X-ray diffraction pattern of AgNP-10CB electrode before and after electrochemistry.

**Table S1:** Measured crystal structure data obtained via Rietveld analysis of the measured X-ray diffraction pattern.

|            | Ag     |           |            | AgCl   |           |            |
|------------|--------|-----------|------------|--------|-----------|------------|
|            | a (Å)  | Size (nm) | Amount (%) | a (Å)  | Size (nm) | Amount (%) |
| AgNP       | 4.0897 | 75        | >99        | -      | -         | -          |
| AgCl-20CNT | 4.0905 | >200      | 15         | 5.6200 | >200      | 85         |

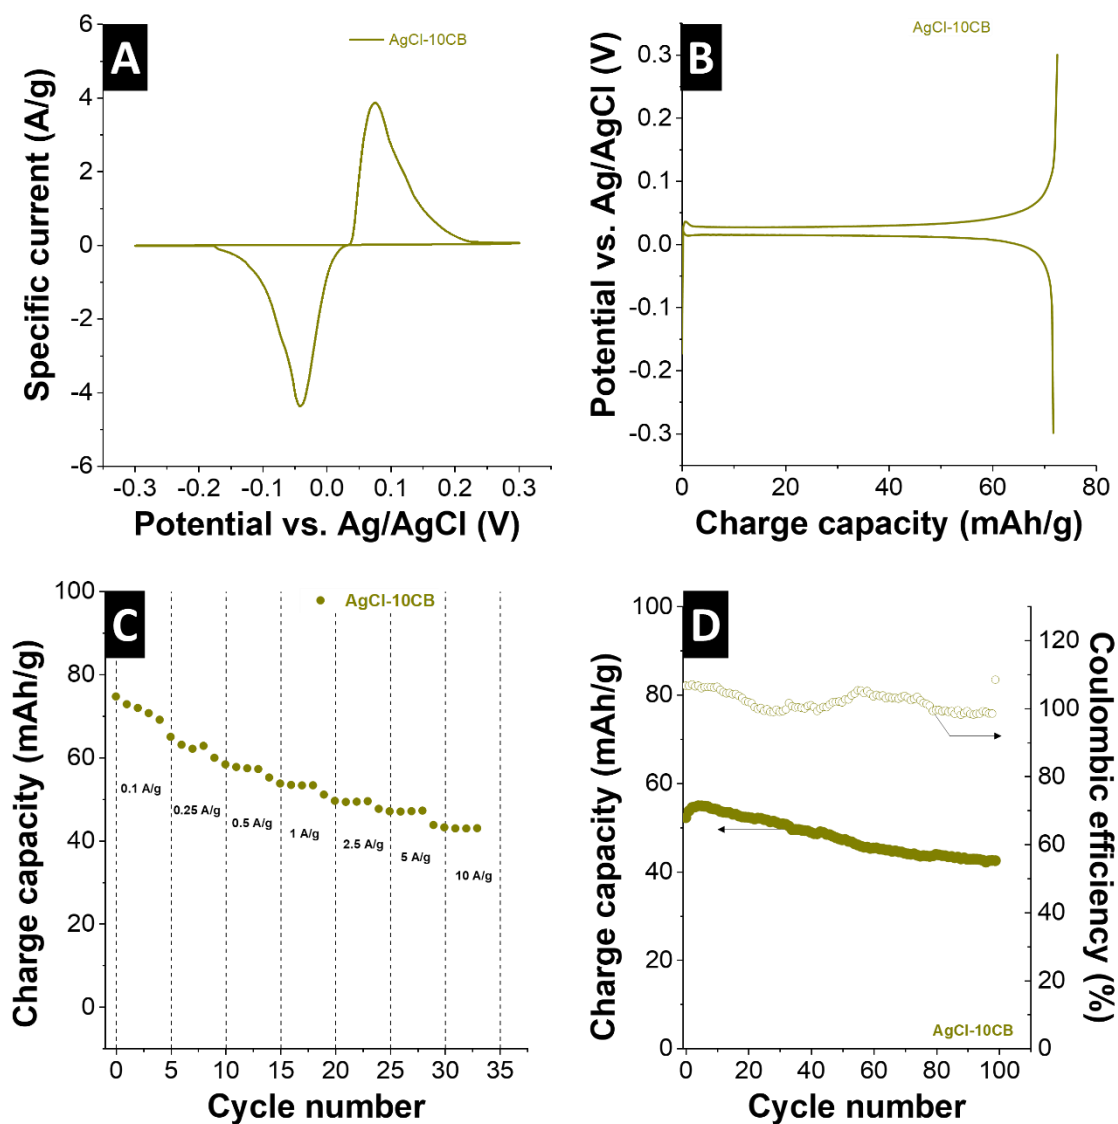

**Figure S3:** Electrochemical characterization using a half-cell setup and 1 M NaCl for AgNP-10CB. For this experiment, AgNP was blended with carbon black the same way as we did for AgCl-20CNT electrodes. A) Cyclic voltammetry at 1 mV/s, B) galvanostatic charge/discharge at 0.1 A/g, C) galvanostatic rate handling at 0.1-10 A/g, and D) galvanostatic charge/discharge cycling stability at 0.25 A/g.

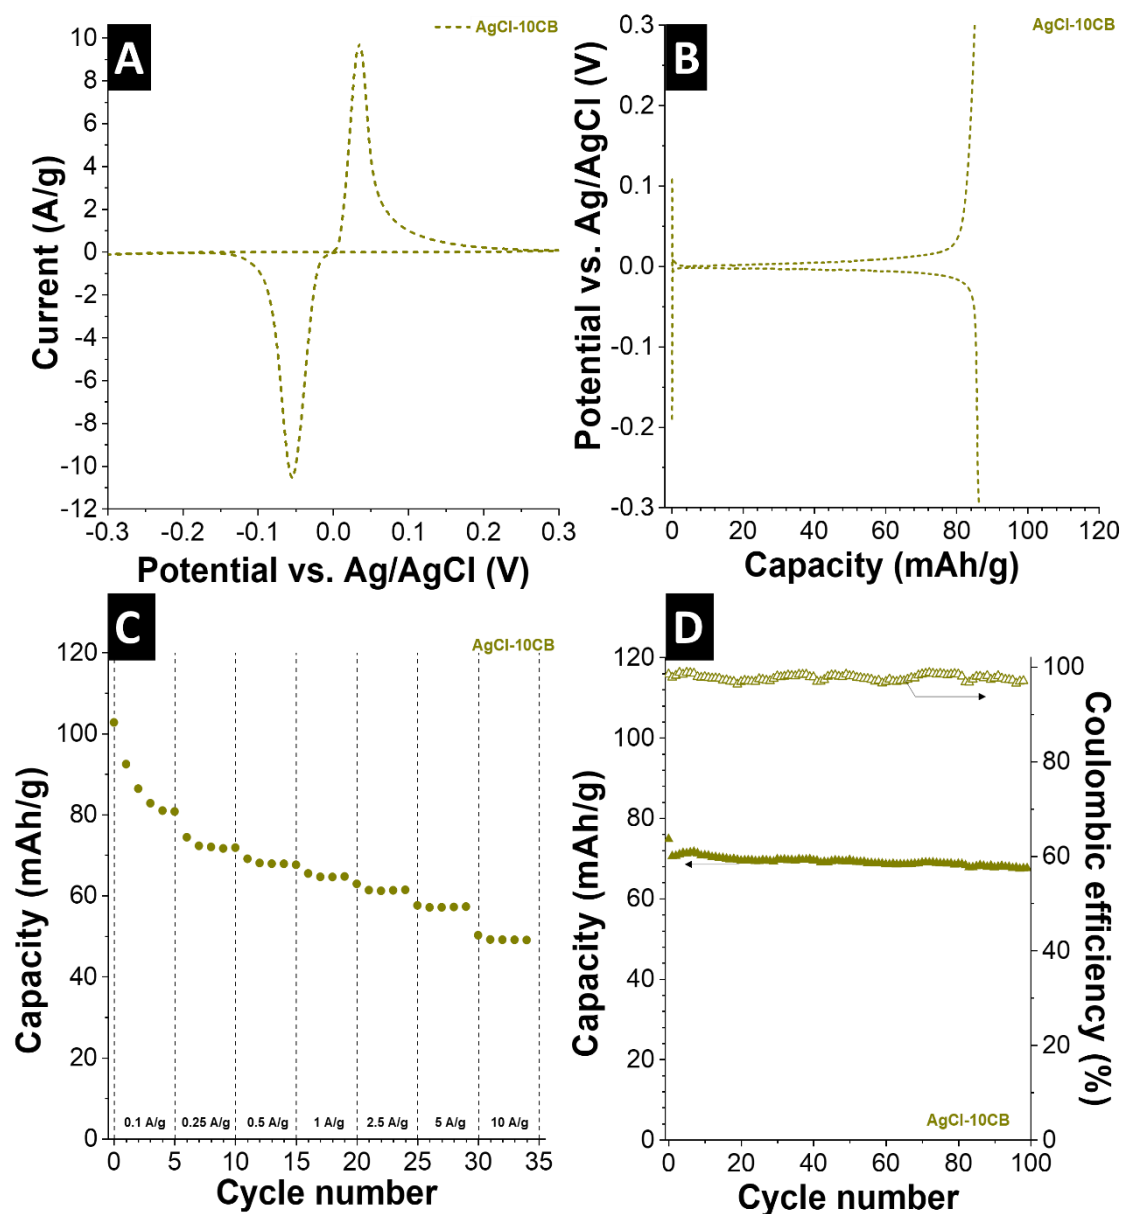

**Figure S4:** Electrochemical characterization using a half-cell setup and 1 M NaCl for AgCl-10CB. For this experiment, Ag was thermally chlorinated at 300 °C for 3 h, achieving full conversion to AgCl. The AgCl powder was then processed like AgNP-10CB electrodes to obtain AgCl-10CB electrodes. A) Cyclic voltammetry at 1 mV/s, B) galvanostatic charge/discharge at 0.1 A/g, C) galvanostatic rate handling at 0.1-10 A/g, and D) galvanostatic charge/discharge cycling stability at 0.25 A/g.

**Table S2:** Desalination performance and corresponding specific capacity for selected literature that provided required data on charge, charge efficiency, and salt removal capacity (considering NaCl as the only salt). NID: sodium-ion desalination. CID: chlorine-ion desalination; CDI: capacitive deionization; MCDI: membrane capacitive deionization. MC-MCDI: multi-channel membrane capacitive deionization (-aq: aqueous media; -bi: organic/aqueous bi-electrolyte).

| Material                                               | Cell type                 | NaCl concentration (mM) | Cell voltage (V)  | Charge capacity (mAh/g) | Desalination capacity (mg/g) | Charge efficiency (%) | Comment                |
|--------------------------------------------------------|---------------------------|-------------------------|-------------------|-------------------------|------------------------------|-----------------------|------------------------|
| Any                                                    | Any                       | Any                     | Any               | 100                     | 109                          | 100                   | Theory, assuming Eq. 3 |
| Any                                                    | Any                       | Any                     | Any               | 100                     | 87                           | 80                    | Theory, assuming Eq. 3 |
| Any                                                    | Any                       | Any                     | Any               | 100                     | 55                           | 50                    | Theory, assuming Eq. 3 |
| Ag/AgCl                                                | CID                       | 600                     | ±0.1              | 110                     | 115                          | 96                    | This work              |
| Ag/AgCl                                                | CID                       | Any                     | Any               | 211                     | 230                          | 100                   | Theory, ideal          |
| Bi/BiClO                                               | CID                       | Any                     | Any               | 114                     | 125                          | 100                   | Theory, ideal          |
| Kynol 5092-15                                          | CDI                       | 5                       | 1.2               | 15 <sup>a</sup>         | 13                           | 76                    | Ref. <sup>1</sup>      |
| Kynol 507-20                                           | CDI                       | 5                       | 1.2               | 16 <sup>a</sup>         | 14                           | 79                    | Ref. <sup>1</sup>      |
| Kynol 507-20+                                          | CDI                       | 5                       | 1.2               | 17 <sup>a</sup>         | 16                           | 89                    | Ref. <sup>1</sup>      |
| Kynol 507-20                                           | MC-MCDI-aq <sup>b</sup>   | 5                       | ±1.2              | 22 <sup>a</sup>         | 22                           | 93                    | Ref. <sup>2</sup>      |
| Kynol 507-20                                           | MC-MCDI-aq <sup>c</sup>   | 5                       | ±1.2              | 54 <sup>a</sup>         | 51                           | 87                    | Ref. <sup>2</sup>      |
| Kynol 507-20                                           | MC-MCDI-bi <sup>d</sup>   | 5                       | 2.4               | 61 <sup>a</sup>         | 63                           | 95                    | Ref. <sup>3</sup>      |
| Kynol 507-20                                           | MC-MCDI-aq/i <sup>e</sup> | 100                     | 0.7               | 100                     | 69                           | 64                    | Ref. <sup>4</sup>      |
| MoS <sub>2</sub>                                       | CDI                       | 500                     | 0.8               | 25                      | 27                           | 96                    | Ref. <sup>5</sup>      |
| Nickel hexacyanoferrate & sodium iron hexacyanoferrate | NID                       | 500                     | Δ0.8 <sup>e</sup> | 56                      | 60                           | 98                    | Ref. <sup>6</sup>      |

<sup>a</sup> Charge storage capacity per one electrode for symmetric cells. <sup>b</sup> side-channel concentration: aqueous 5 mM NaCl. <sup>c</sup> side-channel concentration: aqueous 1000 mM NaCl. <sup>d</sup> side-channel concentration: aqueous 600 mM NaCl and 600 mM NaClO<sub>4</sub> in propylene carbonate. <sup>e</sup> cell was cycled between 0.05 V and 0.85 V.

## Supplementary References

1. C. Kim, P. Srimuk, J. Lee, S. Fleischmann, M. Aslan and V. Presser, *Carbon*, 2017, **122**, 329-335.
2. C. Kim, J. Lee, P. Srimuk, M. Aslan and V. Presser, *ChemSusChem*, 2017, **10**, 4914-4920.
3. C. Kim, P. Srimuk, J. Lee and V. Presser, *Desalination*, 2018, **443**, 56-61.
4. J. Lee, P. Srimuk, S. Carpier, J. Choi, R. L. Zornitta, C. Kim, M. Aslan and V. Presser, *ChemSusChem*, 2018, **11**, 3460-3472.
5. P. Srimuk, J. Lee, S. Fleischmann, S. Choudhury, N. Jäckel, M. Zeiger, C. Kim, M. Aslan and V. Presser, *Journal of Materials Chemistry A*, 2017, **5**, 15640-15649.
6. J. Lee, S. Kim and J. Yoon, *ACS Omega*, 2017, **2**, 1653-1659.
